## ALLATOSTATIN DECREASES STOMATOGASTRIC NEUROMUSCULAR TRANSMISSION IN THE CRAB *CANCER BOREALIS*

JUAN CARLOS JORGE-RIVERA\* AND EVE MARDER†

*Volen Center and Biology Department, Brandeis University, Waltham, MA 02254, USA*

*Accepted 2 September 1997*

### Summary

The effects of insect allatostatins (ASTs) 1–4 were studied on the stomach musculature of the crab *Cancer borealis*. Of these, Diploptera-allatostatin 3 (D-AST-3) was the most effective. D-AST-3 ( $10^{-6}$  mol l<sup>-1</sup>) reduced the amplitude of nerve-evoked contractions, excitatory junctional potentials and excitatory junctional currents at both cholinergic and glutamatergic neuromuscular junctions. Muscle fiber responses to ionophoretic applications of both acetylcholine and glutamate were reduced by the peptide, but D-AST-3 produced no apparent change in the input resistance of the muscle fiber. D-AST-3 reduced the amplitude of muscle contractures

evoked by both acetylcholine and glutamate, but had no effect on contractures induced by a high [K<sup>+</sup>]. These data suggest that D-AST-3 decreases the postsynaptic actions of both neurally released acetylcholine and glutamate. Because an AST-like peptide is found in peripheral sensory neurons that innervate stomatogastric muscles and in the pericardial organs, we suggest that an AST-like peptide may play a role in controlling the gain of the excitatory neuromuscular junctions in the stomach.

Key words: crustacean, acetylcholine receptors, glutamate receptors, neuropeptides, neuromodulation, crab, *Cancer borealis*.

### Introduction

In motor systems, the nervous system generates motor neuron discharge patterns that result in movement. At many invertebrate neuromuscular junctions, the amplitude of the muscle contractions produced by a given temporal pattern of motor neuron discharge can be influenced by neuromodulatory substances, which are either released as cotransmitters from the terminals of the motor neurons themselves (Adams and O'Shea, 1983; Cropper *et al.* 1990) or act as circulating hormones (Keller, 1992; Weimann *et al.* 1997). In either case, the actual movements evoked by a motor pattern may be considerably altered by peripheral neuromodulatory control. In the present paper, we show that a peptide of the allatostatin family also probably functions as a modulator of arthropod neuromuscular junctions.

The muscles of the crustacean stomach receive excitatory innervation from motor neurons located in the stomatogastric ganglion (STG) (Maynard, 1972; Mulloney and Selverston, 1974*a,b*). As is common in arthropods, many of the motor neurons in the STG are glutamatergic (Hooper *et al.* 1986; Lingle, 1980; Marder, 1976). However, an unusual feature of the crustacean stomatogastric system is that some of the STG neurons make excitatory cholinergic synapses onto the muscles they innervate (Lingle, 1980; Marder, 1974, 1976). Also, unlike many other arthropod neuromuscular systems,

stomatogastric muscles do not receive any direct inhibitory innervation (Govind *et al.* 1975).

The STG produces a large repertoire of motor pattern outputs under modulatory control (Harris-Warrick *et al.* 1992; Marder and Calabrese, 1996; Marder and Weimann, 1992). In the crab *Cancer borealis*, neuroactive substances are present in modulatory neurons located in a pair of commissural ganglia (CGs) and in the oesophageal ganglion (OG). These neurons provide direct modulatory inputs to the crab STG (Coleman *et al.* 1992, 1995; Coleman and Nusbaum, 1994; Norris *et al.* 1996). The same neuroactive substances are often found in the eye stalks and pericardial organs (Christie *et al.* 1995), the important neurohemal structures of these animals. Given that STG motor neurons are not known to contain modulatory substances, modulation of most stomatogastric muscles must occur *via* neurohemal control (Jorge-Rivera, 1997; Jorge-Rivera and Marder, 1996; Lingle, 1981; Weimann *et al.* 1997). However, the four gastropyloric receptor (GPR) sensory neurons contain acetylcholine (ACh), serotonin and an allatostatin (AST)-like peptide (Beltz *et al.* 1984; Katz *et al.* 1989; Skiebe and Schneider, 1994), and innervate several of the gastric mill muscles of the stomach. Thus, it is possible that some of the muscles of the stomach could be modulated by serotonin or

\*Present address: Department of Physiology, Dartmouth Medical School, Hanover, NH 03755, USA.

†Author for correspondence (e-mail: Marder@volen.brandeis.edu).

AST-like peptides if these are liberated by the sensory neuron terminals on the surface of the muscles.

A number of modulatory substances increase the amplitude of stomatogastric muscle contractions in response to motor neuron discharge (Jorge-Rivera and Marder, 1996; Lingle, 1981; Meyrand and Marder, 1991; Meyrand and Moulins, 1986; Weimann *et al.* 1997), but to date none has been reported to decrease the gain of the movements evoked by stomatogastric ganglion motor patterns.

The allatostatins (ASTs) have been isolated from a number of insects: D-ASTs from the cockroach *Diploptera punctata* (Pratt *et al.* 1989, 1991; Woodhead *et al.* 1989), P-ASTs from the cockroach *Periplaneta americana* (Ding *et al.* 1995), M-ASTs from the moth *Manduca sexta* (Kramer *et al.* 1991) and C-ASTs from the blowfly *Calliphora vomitoria* (Duve *et al.* 1993). The cDNA and genomic DNA sequences of D-ASTs and P-ASTs show that there are 13 peptide members of the AST family in *D. punctata* and 14 members in *P. americana* (Ding *et al.* 1995; Donly *et al.* 1993). The ASTs inhibit juvenile hormone (JH) biosynthesis by the corpora allata in insects (Tobe and Stay, 1985). AST-like immunoreactivity has also been demonstrated in a number of insect species (Stay *et al.* 1992; Veelaert *et al.* 1995; Yoon and Stay, 1995).

The allatostatins are the only neuropeptides known to inhibit STG motor patterns (Marder *et al.* 1994; Skiebe and Schneider, 1994). In the crab, AST-like peptides are found in 12–19 cell bodies in each CG, two cell bodies in the OG, and in the stomatogastric nerve that carries the axons of many modulatory inputs to the STG (Skiebe and Schneider, 1994). In addition to the four GPR sensory neurons, other potential sources of AST-like peptides include the pericardial organs and sinus glands (Christie *et al.* 1995; Marder *et al.* 1994; Skiebe and Schneider, 1994). Given the presence of AST-like peptides both in sensory neurons that innervate stomatogastric muscles and in neurohemal organs, we wanted to determine whether the ASTs have direct actions on the gain of motor-neuron-evoked movements in the stomatogastric musculature. In the present paper, we demonstrate that one member of the cockroach AST family, D-AST-3, is effective at decreasing the efficacy of the neuromuscular junctions in the crab stomatogastric nervous system.

## Materials and methods

### *Animals and solutions*

Experiments were performed on 175 male *Cancer borealis* Stimpson purchased from local fishermen in Boston, MA, USA, and held in aerated saltwater aquaria at 12 °C until used. Physiological saline had the following composition (in mmol l<sup>-1</sup>): NaCl, 440; KCl, 11.3; CaCl<sub>2</sub>, 13.3; MgCl<sub>2</sub>, 26.3; Trizma base, 11.0; maleic acid, 5.2, pH 7.4–7.6.

D-Allatostatins 1–4 were purchased from Bachem. Each peptide was dissolved in distilled water at 10<sup>-3</sup> or 10<sup>-2</sup> mol l<sup>-1</sup> and stored at -20 °C. Samples were diluted in saline to the desired concentration minutes before experiments. Salines containing high K<sup>+</sup> concentrations, glutamate or ACh were

freshly prepared prior to experiments. Glutamate, ACh and edrophonium chloride were purchased from Sigma. Chlorisondamine was a gift from the Ciba-Geigy Corporation.

### *Physiology*

Muscle names follow the standard stomatogastric system nomenclature (Maynard and Dando, 1974). Neuromuscular preparations were isolated from the foregut of the crab and pinned into 5 ml chambers. Preparations were superfused continuously with a gravity-fed system at 10–15 ml min<sup>-1</sup> unless indicated otherwise. Solutions were bath-applied by means of a switching port on the inflow of the superfusion system. Bath volume was approximately 3 ml. The saline temperature was held between 10–12 °C by means of a Peltier cooling system and was continuously monitored with a thermoelectric probe in the bath.

Innervating nerves were stimulated with trains of pulses through extracellular pin electrodes or suction electrodes. Recordings of excitatory junctional potentials (EJPs) were made using conventional intracellular microelectrodes with resistances of 10–15 MΩ and filled with 2.5 mol l<sup>-1</sup> KCl. Excitatory junctional currents (EJCs) were measured using the two-electrode voltage-clamp technique (TEVC, Axoclamp 2A). The resistance of the electrodes was typically 8 MΩ. The distance between the electrodes was less than 50 μm. The diameter of clamped fibers was typically 150 μm. A grounded shield was placed between the electrodes to reduce the capacitive coupling between the two electrodes. The Axoclamp was used with a gain of 90–100.

Glutamate and ACh responses in muscle were obtained using ionophoretic electrodes filled with 1 mol l<sup>-1</sup> glutamate or 1 mol l<sup>-1</sup> ACh. Pulse durations ranged from 200 ms to 1 s, and ionophoretic current ranged between 200 and 800 nA (positive current pulses were used for ACh, and negative pulses were used for glutamate). Reliable responses were typically found near small branches of the motor nerve. Ionophoretic responses were considered stable if the peak amplitude and time course of the depolarization varied by less than 10% for several pulses. The effects of D-AST-3 were studied after the duration of the pulse and the amount of current injection had been adjusted to evoke 75% of the maximal response to ensure that saturation did not occur. ACh- and glutamate-evoked currents were recorded using TEVC with the ionophoretic electrode positioned within 100 μm of the recording and current-passing electrodes.

Muscle contraction recordings were obtained by attaching the muscle to a modified movement transducer (FT03, Grass Instruments). One of the muscle insertions was pinned down in the dish and the other end was attached to a 15.2 cm thread connected to the transducer at an angle of 45°. In this configuration, stimulation of the motor nerve produced muscle shortening. To obtain ACh- and glutamate-mediated contractures, the muscle was superfused at a rate of 15 ml min<sup>-1</sup> at a given agonist concentration. After maximal contracture for a given concentration had been obtained, the preparation was returned to control saline. There was a 15 min interval between each agonist application.

**Results**

The stomach of the crab is moved by a large number of striated muscles (Fig. 1). The intrinsic muscles insert on two ossicles of the stomach and contract to move these ossicles together. The extrinsic muscles connect one insertion on the surface of the stomach to another on the hypodermis and suspend the stomach in the body cavity. All of the extrinsic muscles are innervated by cholinergic motor neurons, whereas most of the intrinsic muscles are innervated by glutamatergic motor neurons (Hooper *et al.* 1986; Lingle, 1980; Marder, 1974, 1976; Weimann *et al.* 1991). The muscles and their transmitters used in the present paper are listed in Table 1. The original nomenclature (Maynard and Dando, 1974) used the designation 'gm' for the muscles that move the teeth of the gastric mill, the designation 'p' for the muscles of the pyloric chamber, and the designation 'cpv' for the muscles of the cardiopyloric valve.

*D-AST-3 decreases the amplitude of nerve-evoked contractions*

We wanted to determine whether any of the allatostatin peptides alter the amplitude of nerve-evoked muscle contractions in the stomatogastric nervous system. Fig. 2A shows the effect of four cockroach allatostatin peptides (D-ASTs 1–4) on nerve-evoked gm1 and gm4 contractions. The gm1 muscle is innervated by the cholinergic gastric mill (GM)

Table 1. Types of transmitter present in motor neurons innervating specific muscles stomach

| Muscle | Motor neuron                          | Transmitter                                              |
|--------|---------------------------------------|----------------------------------------------------------|
| gm1    | Gastric mill, GM                      | Acetylcholine                                            |
| gm2    | Gastric mill, GM                      | Acetylcholine                                            |
| gm4    | Dorsal gastric, DG                    | Glutamate (also acetylcholine extrajunctional receptors) |
| gm6    | Lateral gastric, LG                   | Glutamate                                                |
| gm8    | Lateral gastric/medial gastric, LG/MG | Glutamate                                                |
| cpv4,6 | Lateral pyloric, LP                   | Glutamate                                                |
| p8     | Pyloric, PY                           | Glutamate                                                |

From Hooper *et al.* (1986); Lingle (1980).  
gm, gastric muscle; cpv, cardiopyloric muscle; p, pyloric muscle.

neurons, whereas the gm4 muscle is innervated by the glutamatergic dorsal gastric (DG) motor neuron. D-AST-1, -2 and -4 ( $10^{-6} \text{ mol l}^{-1}$ ) produced a relatively small reduction in peak nerve-evoked contraction, but D-AST-3 had a much greater effect. All four peptides were applied to the same preparations in numerical order. Fig. 2B shows that  $10^{-6} \text{ mol l}^{-1}$  D-AST-3 reduced the amplitude of the gm1 contractions by more than 50% and of the gm4 contractions

Fig. 1. Stomatogastric musculature. The stomatogastric muscles lie in the external surface of the crustacean stomach. Individual neuromuscular preparations are isolated for physiological experiments after the stomach has been split along the ventral midline and laid flat. Here, only the left side is shown. Posterior is down, and medial is to the right. Gastric muscles (labeled gm) lie in the anterior portion of the stomach. These muscles control the movements of a pair of lateral teeth and of a medial tooth located in the interior of the stomach. Pyloric muscles (labeled p) lie in the posterior portion of the stomach and control the movements of the pyloric chamber, which filters food and absorbs nutrients. Cardiopyloric muscles (labeled cpv) lie between the gastric and pyloric muscles and are involved in the movement of the cardiopyloric valve. Illustration from Weimann *et al.* (1991) with permission.

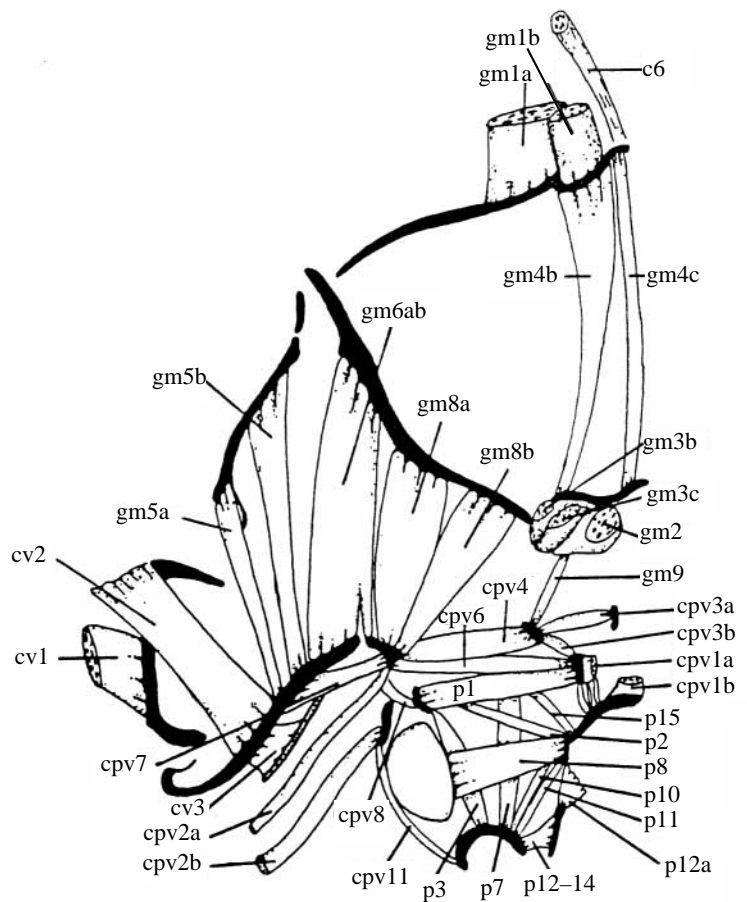

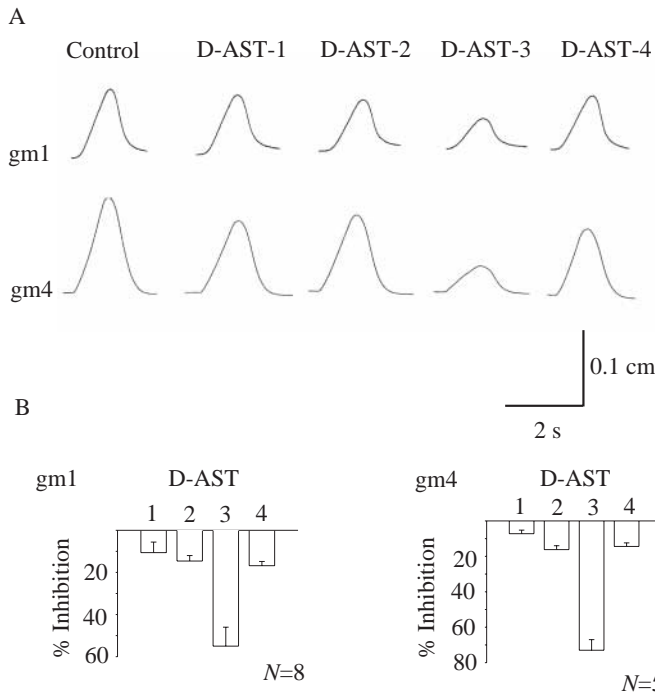

Fig. 2. Effect of  $10^{-6}$  mol l $^{-1}$  D-AST-1, -2, -3 and -4 on nerve-evoked contractions in gm1 and gm4. (A) The motor nerves were stimulated at 20 Hz for 1 s and muscle contraction was monitored with a movement transducer. Each peptide was bath-applied separately with a 15–20 min interval between applications. The contractions returned to control peak amplitude between each peptide application. (B) Histograms showing pooled data for each muscle. D-AST-3 reduced the peak amplitude of nerve-evoked gm1 and gm4 contractions more effectively than did D-AST-1, D-AST-2 and D-AST-4. Error bars are standard errors of the mean.

by more than 70%. All of these data were taken from responses to single trains of stimuli.

Because D-AST-3 was the most effective of the allatostatins tested, all further studies were carried out with this peptide. We used nerve-evoked contractions to screen the effect of D-AST-3 in other stomatogastric muscles to determine whether the effects of D-AST-3 were specific to the first muscles tested. Fig. 3 shows the effect of bath application of  $10^{-6}$  mol l $^{-1}$  D-AST-3 on the gm2, gm8, cpv4,6 and p8 muscles. These muscles include two additional gm muscles, the cholinergic gm2 muscle and the glutamatergic gm8 muscle as well as one glutamatergic p muscle, p8, and the glutamatergic cpv4,6 muscles. Each muscle was stimulated with a spike train that approximately mimics the pattern of action potential discharge of its innervating motor neuron. Fig. 3 shows that D-AST-3 decreased the peak nerve-evoked contractions in all four muscles. Note that the percentage decrease in the contraction amplitude of the muscles activated with repetitive pyloric-rhythm-timed stimuli (p8 and cpv4,6) was not constant, but that the difference between the control and D-AST-3 recordings decreased with successive stimuli. We did not study the effects of D-AST-3 on contractions evoked by more than four or five successive stimuli. In these cases, the amplitude of

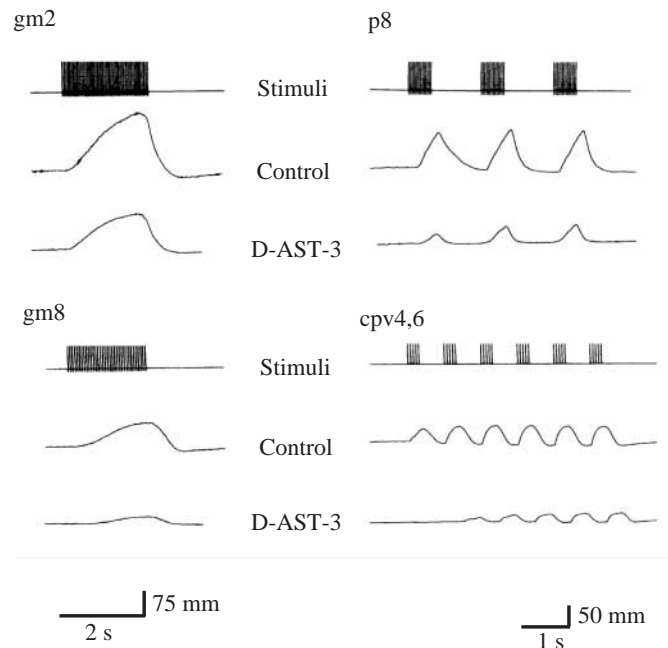

Fig. 3. Effect of  $10^{-6}$  mol l $^{-1}$  D-AST-3 on nerve-evoked contractions. Gastric muscle contractions were obtained by stimulating the motor nerve in 'gastric time' (gm2, 20 Hz for 2 s; gm8, 15 Hz for 2 s), whereas p8 and cpv4,6 muscle contractions were obtained by stimulating the motor nerve in 'pyloric time' (15 Hz for 0.5 s every 1 s for p8 and 10 Hz for 0.5 s every 0.75 s for cpv4,6).

the contraction in response to the last stimulus was smaller than that of the control.

#### D-AST-3 decreases the amplitude of nerve-evoked EJPs

To determine whether the decrease in nerve-evoked contractions produced by D-AST-3 was associated with a decrease in the amplitude of nerve-evoked EJPs, we examined the effect of D-AST-3 on gm1, gm6 and gm8 EJPs. The EJP recordings seen in Fig. 4 show that these synapses display both considerable facilitation during the spike train and considerable summation of the postsynaptic potential. D-AST-3 decreased the final peak depolarization in all three muscles (paired *t*-test,  $P \leq 0.01$ ). The histograms on the right of Fig. 4 show the pooled data for each muscle. Note that the amplitude of the first EJP decreases more in the presence of D-AST-3 than does the amplitude of the final membrane potential reached at the end of the train. However, the final peak depolarization is a combined result of the summation and of the unitary EJP amplitudes, and we therefore measured the amplitudes of the first and last EJPs in control saline and in the presence of D-AST-3. (The amplitude of the last EJP was measured by extrapolating the decay of the previous EJP to find the baseline membrane potential at the time of the last EJP, and then measuring the amplitude from that baseline.) If the facilitation index ( $F_i$ ) is defined as:  $F_i = \text{EJP amplitude (last)} / \text{EJP amplitude (first)} - 1$ , we find that D-AST-3 produces an increase in  $F_i$  from 2.7 to 6.9 ( $P < 0.05$ ) in the gm8 muscle, but only statistically insignificant changes in  $F_i$  in the other muscles.



Fig. 4. Effect of  $10^{-6}$  mol l $^{-1}$  D-AST-3 on nerve-evoked EJPs and peak membrane potential ( $V_m$ ). gm1 EJPs were obtained by stimulating the motor nerve at 10 Hz for 2 s. gm6 EJPs were obtained by stimulating the motor nerve at 10 Hz for 2 s. gm8 EJPs were obtained by stimulating the motor nerve at 12 Hz for 1 s. Scale bars: gm1, 5 mV, 2 s; gm6, 10 mV, 2 s; gm8, 6 mV, 1 s. The histograms show the peak membrane potential reached by the first EJP and at the end of the train of EJPs for pooled data. Open bars, control; filled bars, D-AST-3. \* $P \leq 0.01$ , in paired  $t$ -tests. Error bars are standard errors of the mean.

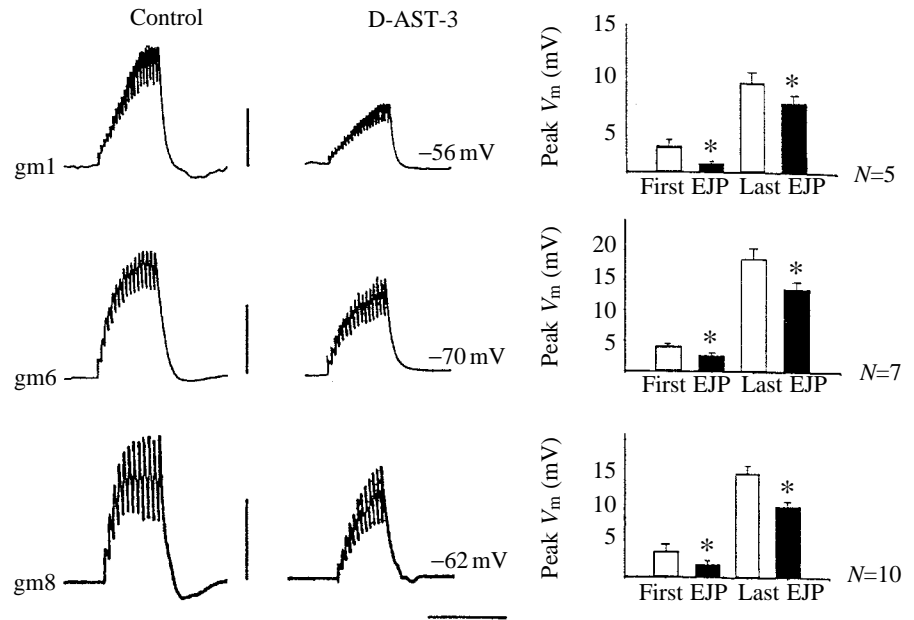

To measure the effect of D-AST-3 on the synaptic current, muscle fibers were voltage-clamped, and EJCs were evoked in control saline and in the presence of the peptide. Fig. 5 illustrates the results of one such experiment on the cholinergic EJCs in gm1. As was the case in the recordings of EJPs (Fig. 4), the reduction in the amplitude of the EJC was markedly larger for the first (smaller) EJC than for the last (larger) EJC in the train.

#### *D-AST has no obvious effect on resting muscle fiber input impedance*

Current-voltage plots were constructed to determine whether D-AST-3 produced a direct effect on muscle fiber input impedance. Fig. 6 shows examples of current *versus* voltage plots for the gm1, gm4 and gm6 muscles measured with two microelectrodes in control saline and in saline containing  $10^{-6}$  mol l $^{-1}$  D-AST-3. In all cases, the input impedance of muscle fiber did not change over the range of membrane potentials tested. Pooled data show that the change in input impedance was less than 5% ( $N=4$  for each muscle; not shown). Unfortunately, we were unable to measure reliably any changes in input impedance at potentials considerably above the resting potential because depolarizing pulses produced fiber contraction that expelled the microelectrodes from the recording site. In three preparations, we tested fiber impedance at depolarized potentials in the presence of  $20$  mmol l $^{-1}$  Mn $^{2+}$  to decrease muscle contraction, and we did not detect a change in impedance in the presence of D-AST-3 (results not shown).

#### *D-AST-3 reduces the amplitude of exogenous agonist-evoked muscle contractures*

The effects of D-AST-3 on nerve-evoked contractures and synaptic responses could be produced by effects on the

presynaptic release of neurotransmitter, the postsynaptic response to the transmitter, or both of these. To investigate these possibilities further, we wished to determine whether D-AST-3 reduced the amplitude of postsynaptic responses to exogenously applied ACh or glutamate. In a first set of experiments, we performed dose-response curves with agonists in the presence and absence of D-AST-3. Fig. 7A shows gm4 contractures evoked by bath application of glutamate at concentrations from  $3 \times 10^{-5}$  to  $10^{-3}$  mol l $^{-1}$ . As can be seen, D-AST-3 inhibits glutamatergic contractures at  $5 \times 10^{-5}$  and  $10^{-4}$  mol l $^{-1}$  but not at  $3 \times 10^{-4}$  or  $10^{-3}$  mol l $^{-1}$ . We took advantage of the fact that the gm4 muscle expresses extrajunctional cholinergic receptors in addition to its glutamatergic junctional receptors (Lingle, 1980) to compare the effects of D-AST-3 on cholinergic contractures in the same muscle. In these experiments, we bath-applied ACh from  $10^{-7}$  to  $5 \times 10^{-3}$  mol l $^{-1}$  in the presence of  $5 \times 10^{-5}$  mol l $^{-1}$  edrophonium chloride, an acetylcholinesterase inhibitor. As

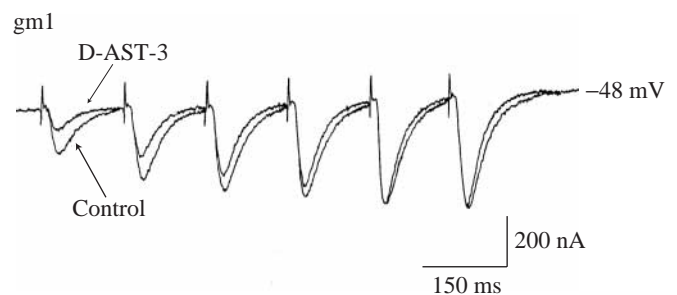

Fig. 5. Effect of  $10^{-5}$  mol l $^{-1}$  D-AST-3 on nerve-evoked EJCs. A gm1 muscle fiber was voltage-clamped with two microelectrodes at resting potential. The motor nerve was stimulated at 8 Hz for 750 ms, and EJC recordings were obtained under control conditions and upon bath-application of  $10^{-5}$  mol l $^{-1}$  D-AST-3 (shown superimposed).

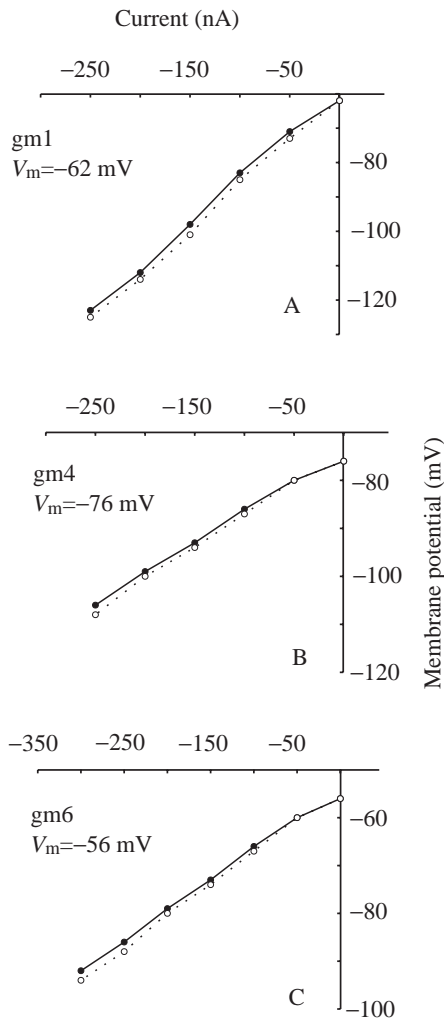

Fig. 6. Effect of  $10^{-6}$  mol l $^{-1}$  D-AST-3 on muscle fiber impedance. (A) gm1, (B) gm4 and (C) gm6 muscle fibers were impaled with two microelectrodes. Input impedance was measured in current-clamp mode by injecting a family of hyperpolarizing 1 sec pulses every 5 sec into the muscle fibers under control conditions (filled circles).  $10^{-6}$  mol l $^{-1}$  D-AST-3 was bath-applied and hyperpolarizing pulses of the same amplitude were given (open circles). The resting potential ( $V_m$ ) of muscle fiber is indicated for each plot.

with glutamatergic contractures,  $10^{-6}$  mol l $^{-1}$  D-AST-3 decreased the amplitude of the cholinergic contractures (Fig. 7B). Note that, under control conditions,  $5 \times 10^{-3}$  mol l $^{-1}$  ACh produced slightly smaller contractures than  $10^{-3}$  mol l $^{-1}$  ACh (probably because of increased desensitization).

#### Dose-dependence of the effects of D-AST-3

The pronounced effect of repeated stimulation on the effectiveness of the D-AST-3-induced decrease in the amplitude of EJPs and EJC's precluded their use to determine the dose-dependence of the actions of D-AST-3. We therefore used agonist-evoked contractures to obtain a rough estimate of the dose-dependence of the effects of D-AST-3. Fig. 7C shows that the amplitude of contractures elicited by  $5 \times 10^{-5}$  mol l $^{-1}$  ACh (in the presence of edrophonium chloride) was decreased

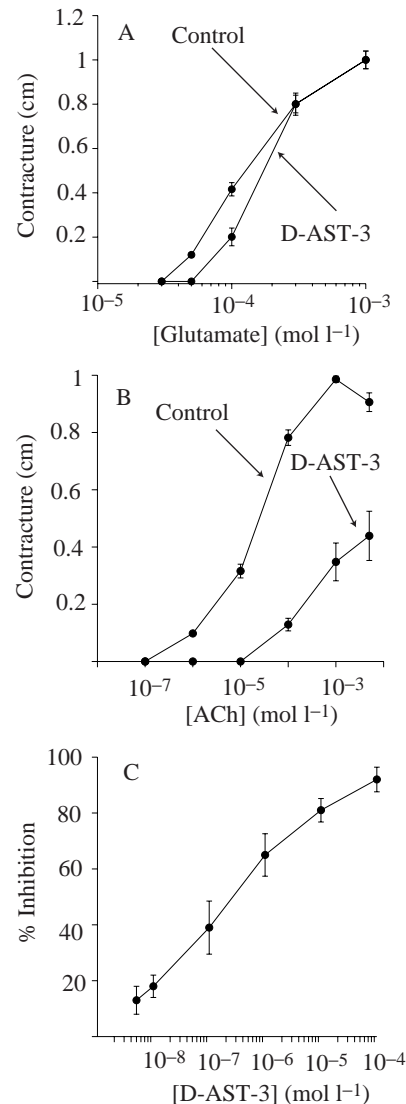

Fig. 7. Effect of  $10^{-6}$  mol l $^{-1}$  D-AST-3 on agonist-mediated contractures. (A) gm4 contractures were obtained by bath-application of glutamate from  $3 \times 10^{-5}$  to  $10^{-3}$  mol l $^{-1}$  with a 15 min interval between applications. After control contractures had been obtained, the same glutamate concentrations were co-applied with  $10^{-6}$  mol l $^{-1}$  D-AST-3 every 15 min ( $N=7$ ). (B) Acetylcholine (ACh) was bath-applied from  $10^{-7}$  to  $5 \times 10^{-3}$  mol l $^{-1}$  in control saline and in the presence of  $10^{-6}$  mol l $^{-1}$  D-AST-3 ( $N=5$ ). (C) The effect of D-AST-3 at concentrations ranging from  $10^{-8}$  to  $10^{-4}$  mol l $^{-1}$  on contractures mediated by  $5 \times 10^{-5}$  mol l $^{-1}$  ACh ( $N=5$ ). There was a 15 min interval between each bath application. Values are means  $\pm$  S.E.M.

in a dose-dependent manner by D-AST-3. The threshold for this effect was between  $10^{-9}$  and  $5 \times 10^{-9}$  mol l $^{-1}$  D-AST-3, with virtually complete inhibition of the contractures at  $10^{-4}$  mol l $^{-1}$  D-AST-3.

#### Does D-AST-3 act directly on the contractile mechanism?

The inhibition of agonist-mediated (ACh and glutamate) contractures does not distinguish between possible actions on the receptor-channel complex and on excitation-contraction

coupling. To look directly at the effects of AST on glutamate and ACh receptors, we applied ACh and glutamate ionophoretically to gm1 and gm8 muscles. Once a reliable ionophoretic response had been obtained, D-AST-3 was bath-applied. Fig. 8A shows that  $10^{-6} \text{ mol l}^{-1}$  D-AST-3 decreased the amplitude of the ACh response on gm1 by approximately 50% ( $N=3$ ), and Fig. 8B shows that  $10^{-6} \text{ mol l}^{-1}$  D-AST-3 decreased the amplitude of the gm8 glutamate response by approximately 40% ( $N=3$ ).

The percentage decrease in the ACh response elicited by D-AST-3 was voltage-dependent, as shown in experiments in which a gm1 muscle fiber was voltage-clamped with two microelectrodes and ACh was applied ionophoretically at different holding potentials. Fig. 9A shows ACh responses at holding potentials of  $-60$ ,  $-70$  and  $-80 \text{ mV}$  before and during bath application of D-AST-3 (shown superimposed). The percentage decrease in the amplitude of the ACh response was more pronounced at more hyperpolarized membrane potentials. Fig. 9B shows pooled data from five experiments illustrating that the percentage decrease in amplitude produced by D-AST-3 was almost 50% at  $-100 \text{ mV}$ , but only approximately 30% at  $-60 \text{ mV}$ .

The experiments with ionophoretic applications of agonist demonstrate that D-AST-3 decreases agonist-evoked membrane currents, but do not eliminate the possibility that D-

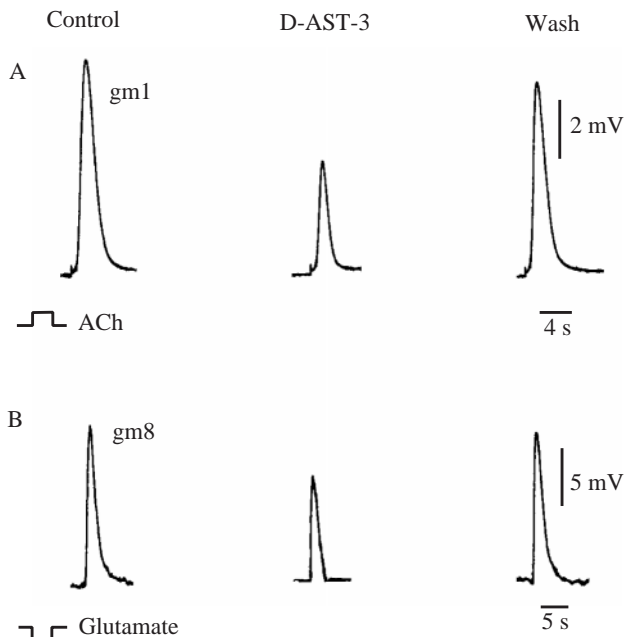

Fig. 8. Effect of  $10^{-6} \text{ mol l}^{-1}$  D-AST-3 on ionophoretic responses. (A) Acetylcholine (ACh)-mediated depolarization was obtained in a gm1 muscle fiber using a  $1 \text{ mol l}^{-1}$  ACh ionophoretic electrode in control saline and in saline containing peptide. The ionophoretic pulse was  $300 \text{ nA}$  for  $200 \text{ ms}$ . Resting potential,  $-53 \text{ mV}$ . (B) Glutamate-mediated depolarization was obtained in a gm8 muscle fiber using a  $1 \text{ mol l}^{-1}$  glutamate ionophoretic electrode in control saline and in saline containing peptide. The ionophoretic current pulse was  $-500 \text{ nA}$  for  $400 \text{ ms}$ . There was a  $5 \text{ min}$  interval between each ionophoretic response for each muscle. Resting potential,  $-61 \text{ mV}$ .

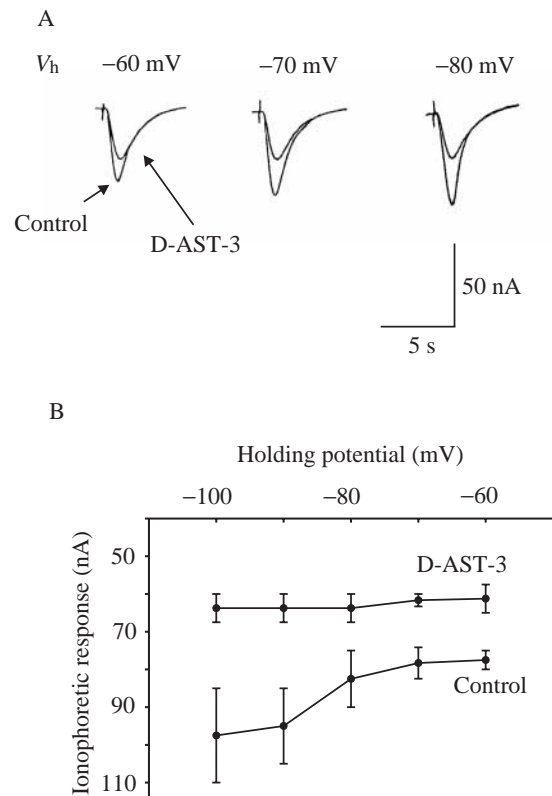

Fig. 9. The effect of D-AST-3 on acetylcholine (ACh) ionophoretic responses is voltage-dependent. (A) A gm1 muscle fiber was voltage-clamped with two microelectrodes placed on each side of an ionophoretic electrode filled with  $1 \text{ mol l}^{-1}$  ACh. The muscle fiber was clamped at a holding potential of  $-60 \text{ mV}$ ,  $-70 \text{ mV}$  or  $-80 \text{ mV}$ , and ionophoretic responses to ACh were obtained by injection of  $400 \text{ nA}$  of current for  $250 \text{ ms}$ . D-AST-3 was bath-applied at  $10^{-6} \text{ mol l}^{-1}$  and ACh responses were obtained as before. (B) Pooled data from five preparations. The error bars are standard errors of the mean.

AST-3 also has a direct effect on the muscle contractile apparatus. To examine this possibility, we produced muscle contractures by depolarizing the muscles directly with saline containing an elevated  $[\text{K}^+]$ . To reduce the postsynaptic effects of any transmitter released from depolarized motor neuron terminals, we bathed the muscles in high concentrations of chlorisondamine, which blocks both glutamate- and ACh-activated conductances on stomatogastric muscles (Lingle, 1983; Lingle *et al.* 1981). Fig. 10 shows that  $10^{-6} \text{ mol l}^{-1}$  D-AST-3 did not decrease the amplitude of  $\text{K}^+$ -evoked contractures in gm4 ( $N=3$ ), suggesting that the decrease in amplitude of agonist-evoked contractures (Figs 3, 7) can be accounted for by the decrease in amplitude of the postsynaptic responses to the agonists.

## Discussion

Modulation of the interaction between the motor neuron discharge pattern and muscle movement is known to occur in many invertebrate motor systems (Calabrese, 1989; Weiss *et al.* 1978; Whim and Lloyd, 1990). In many of the preparations

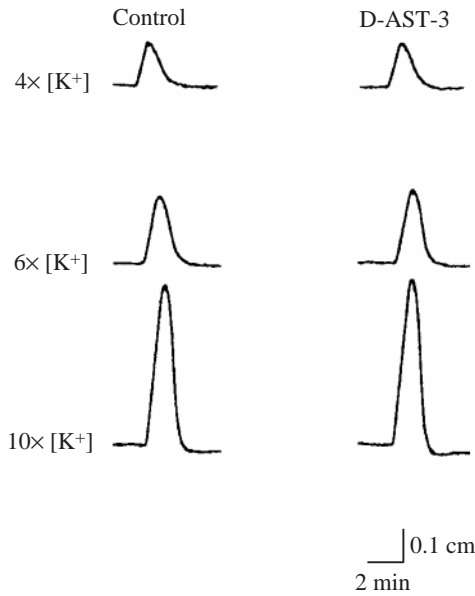

Fig. 10. The effect of  $10^{-6} \text{ mol l}^{-1}$  D-AST-3 on  $\text{K}^+$ -mediated contractures in gm4.  $\text{K}^+$  was bath-applied at 4, 6 and 10 times its normal concentration in the presence of  $10^{-3} \text{ mol l}^{-1}$  chlorisondamine. After obtaining control traces,  $\text{K}^+$  was co-applied at same concentrations in the presence of  $10^{-3} \text{ mol l}^{-1}$  chlorisondamine and  $10^{-6} \text{ mol l}^{-1}$  D-AST-3. The muscle was allowed to rest for 10 min between each bath application.

in which peripheral neuromodulation has been most extensively studied, considerably less is known about the mechanisms by which the circuits that generate movements are modulated than is known about peripheral modulation. In contrast, in the stomatogastric nervous system, studies of modulation of the central pattern-generating circuits have preceded the extensive study of the effects of neuromodulators on the periphery. It is now clear that many of the same neuromodulators that act on the central pattern circuits in the stomatogastric ganglion also act peripherally to modify the interaction between the motor pattern and movement of some or many of the stomach muscles (Jorge-Rivera, 1997). Many peripheral neuromodulatory actions will amplify the effect of central neuromodulation. For example, crustacean cardioactive peptide (CCAP) strongly enhances burst firing of the lateral pyloric (LP) neuron of the STG and also increases the amplitude of nerve-evoked contractions in muscles innervated by the LP neuron (Weimann *et al.* 1997).

We have shown that D-AST-3 has direct physiological actions on the peripheral stomatogastric nervous system. D-AST-3 decreases the amplitude of nerve-evoked contractions of several of the muscles of the stomach. Previous work has already demonstrated that D-AST-3 decreases the frequency of the pyloric motor pattern and the firing rates of many of the stomatogastric ganglion neurons (Marder *et al.* 1994; Skiebe and Schneider, 1994). Interestingly, the effects of AST on the STG are most pronounced when it is applied to preparations that are already relatively weakly active (Skiebe and

Schneider, 1994), and our data suggest that AST will be most effective peripherally under conditions of lower firing frequency (Fig. 5). Thus, as with CCAP, to a first approximation, the effects of AST on the periphery will tend to act synergistically with its central effects.

AST-like immunoreactivity is found in the GPR neurons (Skiebe and Schneider, 1994) and therefore could be released from the peripheral terminals of these neurons as they ramify over some of the gastric mill muscles. However, a number of the muscles studied here are not known to be innervated by any AST-immunoreactive neurons and, therefore, if the actions of D-AST-3 reported here have physiological relevance, AST would have to reach those muscles by a hormonal delivery route. AST-like immunoreactivity is found in both the pericardial organs and the sinus glands of *C. borealis* (Christie *et al.* 1995), and it is therefore likely that ASTs are released into the general circulation and could act on the muscles of the stomatogastric ganglion. However, if an AST-like peptide were to act as a circulating hormone, it would need to act at relatively low concentrations, as other circulating hormones in crustaceans are found in the hemolymph at concentrations between  $10^{-11}$  and  $2 \times 10^{-9} \text{ mol l}^{-1}$  (Kobierski *et al.* 1987; Stangier *et al.* 1988).

Features of the physiological actions of D-AST-3 precluded accurate dose-response measurements for AST-3. Specifically, the effects of D-AST-3 were both voltage-dependent (Fig. 9) and dependent on the amplitude of the synaptic potential (Figs 4, 5). The threshold for physiological action of D-AST-3 on ACh-mediated contractures was  $5 \times 10^{-9} \text{ mol l}^{-1}$ . However, it will be necessary to purify the native crab AST-like peptide(s) before it is possible to determine unequivocally the threshold concentration of AST for physiological action. If we assume that the native peptide(s) is likely to be more potent than the insect peptides used in the present study, then it is likely that the physiological actions reported here could be produced by hormonally delivered peptides.

#### Mechanism of action

The possible mechanism(s) by which D-AST-3 decreases the amplitude of both ACh and glutamate receptor-mediated increases in conductance is worth some speculation. It is hard to imagine that the same peptide could competitively inhibit the binding both of ACh to its receptor and of glutamate to its receptor, although many of the actions of D-AST-3 do appear to be competitive. Specifically, smaller EJPs and EJC's are reduced in amplitude considerably more than larger ones. If one assumes that the smaller EJPs and EJC's produced early in the train represent lower concentrations of released transmitter than the larger ones that result from the facilitation of the terminal, this would be consistent with the apparently competitive-looking curves seen with agonist-induced contractures. One possibility consistent with all of our data is that D-AST-3 activates a second-messenger system that results in modification of both the ACh receptor and the glutamate receptor, producing 'competitive-looking' blocks of both, although not because the peptide is blocking the action of either ACh or glutamate for its



receptor. However, a full understanding of these phenomena will require single-channel biophysical measurements and a variety of other mechanistic studies.

#### Functional consequences

In conclusion, it is likely that allatostatin-like peptides could function to decrease the gain of the functional transfer from motor pattern to movement in the stomatogastric system, which lacks direct inhibitory innervation. AST liberated from terminals of the GPR neurons could selectively regulate the tension and contraction in those muscles in a peripheral feedback loop. It is also possible that circulating AST could play a role in setting the tone of many of the stomach muscles, since AST sensitivity is widespread in these muscles.

This research was funded by NS17183 and the Human Frontiers Science Program Organization. J.C.J.-R. was a recipient of a Ford Foundation Dissertation Fellowship. We thank the W. M. Keck Foundation for support.

#### References

- ADAMS, M. E. AND O'SHEA, M. (1983). Peptide cotransmitter at a neuromuscular junction. *Science* **221**, 286–288.
- BELTZ, B., EISEN, J. S., FLAMM, R., HARRIS-WARRICK, R. M., HOOPER, S. AND MARDER, E. (1984). Serotonergic innervation and modulation of the stomatogastric ganglion of three decapod crustaceans (*Panulirus interruptus*, *Homarus americanus* and *Cancer irroratus*). *J. exp. Biol.* **109**, 35–54.
- CALABRESE, R. L. (1989). Modulation of muscle and neuromuscular junctions in invertebrates. *Sem. Neurosci.* **1**, 25–34.
- CHRISTIE, A. E., SKIEBE, P. AND MARDER, E. (1995). Matrix of neuromodulators in neurosecretory structures of the crab *Cancer borealis*. *J. exp. Biol.* **198**, 2431–2439.
- COLEMAN, M. J., MEYRAND, P. AND NUSBAUM, M. P. (1995). A switch between two modes of synaptic transmission mediated by presynaptic inhibition. *Nature* **378**, 502–505.
- COLEMAN, M. J. AND NUSBAUM, M. P. (1994). Functional consequences of compartmentalization of synaptic input. *J. Neurosci.* **14**, 6544–6552.
- COLEMAN, M. J., NUSBAUM, M. P., COUNIL, I. AND CLAIBORNE, B. J. (1992). Distribution of modulatory inputs to the stomatogastric ganglion of the crab, *Cancer borealis*. *J. comp. Neurol.* **325**, 581–594.
- CROPPER, E. C., PRICE, D., TENENBAUM, R., KUPFERMANN, I. AND WEISS, K. R. (1990). Release of peptide transmitters from a cholinergic motor neuron under physiological conditions. *Proc. natn. Acad. Sci. U.S.A.* **87**, 933–937.
- DING, Q., DONLY, B. C., TOBE, S. S. AND BENDENA, W. G. (1995). Comparison of the allatostatin neuropeptide precursors in the distantly related cockroaches *Periplaneta americana* and *Diploptera punctata*. *Eur. J. Biochem.* **234**, 737–746.
- DONLY, B. C., DING, Q., TOBE, S. S. AND BENDENA, W. G. (1993). Molecular cloning of the gene for the allatostatin family of neuropeptides from the cockroach *Diploptera punctata*. *Proc. natn. Acad. Sci. U.S.A.* **90**, 8807–8811.
- DUVE, H., JOHNSON, A. H., SCOTT, A. G., YU, C. G. AND YAGI, K. J. (1993). Callatostatins: neuropeptides from the blowfly *Calliphora vomitoria* with sequence homology to cockroach allatostatins. *Proc. natn. Acad. Sci. U.S.A.* **90**, 2456–2460.
- GOVIND, C. K., ATWOOD, H. L. AND MAYNARD, D. M. (1975). Innervation and neuromuscular physiology of intrinsic foregut muscles in the blue crab and spiny lobster. *J. comp. Physiol.* **96**, 185–204.
- HARRIS-WARRICK, R. M., MARDER, E., SELVERSTON, A. I. AND MOULINS, M. (1992). *Dynamic Biological Networks. The Stomatogastric Nervous System*. Cambridge: MIT Press. 328pp.
- HOOPER, S. L., O'NEIL, M. B., WAGNER, R. J., EWER, J., GOLOWASCH, J. AND MARDER, E. (1986). The innervation of the pyloric region of the crab, *Cancer borealis*: homologous muscles in decapod species are differently innervated. *J. comp. Physiol. A* **159**, 227–240.
- JORGE-RIVERA, J. C. (1997). Modulation of stomatogastric musculature in the crab *Cancer borealis*. In *Neuroscience Graduate Program*, pp. 114. Ph.D. Dissertation, Waltham: Brandeis University.
- JORGE-RIVERA, J. C. AND MARDER, E. (1996). TNRNFLRFamide and SDRNFLRFamide modulate muscles of the stomatogastric system of the crab *Cancer borealis*. *J. comp. Physiol. A* **179**, 741–751.
- KATZ, P. S., EIGG, M. H. AND HARRIS-WARRICK, R. M. (1989). Serotonergic/cholinergic muscle receptor cells in the crab stomatogastric nervous system. I. Identification and characterization of the gastropyloric receptor cells. *J. Neurophysiol.* **62**, 558–570.
- KELLER, R. (1992). Crustacean neuropeptides: structures, functions and comparative aspects. *Experientia* **48**, 439–448.
- KOBIERSKI, L. A., BELTZ, B. S., TRIMMER, B. A. AND KRAVITZ, E. A. (1987). FMRFamide-like peptides of *Homarus americanus*: distribution, immunocytochemical mapping and ultrastructural localization in terminal varicosities. *J. comp. Neurol.* **166**, 1–15.
- KRAMER, S. J., TOSCHI, A., MILLER, C. A., KATAOKA, H., QUISTAD, G. B., LI, J. P., CARNEY, R. L. AND SCHOOLEY, D. A. (1991). Identification of an allatostatin from the tobacco hornworm *Manduca sexta*. *Proc. natn. Acad. Sci. U.S.A.* **88**, 9458–9462.
- LINGLE, C. (1980). The sensitivity of decapod foregut muscles to acetylcholine and glutamate. *J. comp. Physiol.* **138**, 187–199.
- LINGLE, C. (1981). The modulatory action of dopamine on crustacean foregut neuromuscular preparations. *J. exp. Biol.* **94**, 285–299.
- LINGLE, C. (1983). Blockage of cholinergic channels by chlorisondamine on a crustacean muscle. *J. Physiol., Lond.* **339**, 395–417.
- LINGLE, C., EISEN, J. S. AND MARDER, E. (1981). Block of glutamatergic excitatory synaptic channels by chlorisondamine. *Molec. Pharmac.* **19**, 349–353.
- MARDER, E. (1974). Acetylcholine as an excitatory neuromuscular transmitter in the stomatogastric system of the lobster. *Nature* **251**, 730–731.
- MARDER, E. (1976). Cholinergic motor neurones in the stomatogastric system of the lobster. *J. Physiol., Lond.* **257**, 63–86.
- MARDER, E. AND CALABRESE, R. L. (1996). Principles of rhythmic motor pattern generation. *Physiol. Rev.* **76**, 687–717.
- MARDER, E., SKIEBE, P. AND CHRISTIE, A. E. (1994). Multiple modes of network modulation. *Verh. dt. zool. Ges.* **87**, 177–184.
- MARDER, E. AND WEIMANN, J. M. (1992). Modulatory control of multiple task processing in the stomatogastric nervous system. In *Neurobiology of Motor Programme Selection* (ed. J. Kien, C. McCrohan and B. Winlow), pp. 3–19. New York: Pergamon Press.
- MAYNARD, D. M. (1972). Simpler networks. *Ann. N.Y. Acad. Sci.* **193**, 59–72.
- MAYNARD, D. M. AND DANDO, M. R. (1974). The structure of the

- stomatogastric neuromuscular system in *Callinectes sapidus*, *Homarus americanus* and *Panulirus argus* (Decapoda Crustacea). *Phil. Trans. R. Soc. Lond. B* **268**, 161–220.
- MEYRAND, P. AND MARDER, E. (1991). Matching neural and muscle oscillators: control by FMRamide-like peptides. *J. Neurosci.* **11**, 1150–1161.
- MEYRAND, P. AND MOULINS, M. (1986). Myogenic oscillatory activity in the pyloric rhythmic motor system of Crustacea. *J. comp. Physiol.* **158**, 489–503.
- MULLONEY, B. AND SELVERSTON, A. I. (1974a). Organization of the stomatogastric ganglion in the spiny lobster. I. Neurons driving the lateral teeth. *J. comp. Physiol.* **91**, 1–32.
- MULLONEY, B. AND SELVERSTON, A. I. (1974b). Organization of the stomatogastric ganglion in the spiny lobster. III. Coordination of the two subsets of the gastric system. *J. comp. Physiol.* **91**, 53–78.
- NORRIS, B. J., COLEMAN, M. J. AND NUSBAUM, M. P. (1996). Pyloric motor pattern modification by a newly identified projection neuron in the crab stomatogastric nervous system. *J. Neurophysiol.* **75**, 97–108.
- PRATT, G. E., FARNSWORTH, D. E., FOK, K. F., SIEGEL, N. R., MCCORMACK, A. L., SHABANOWITZ, J., HUNT, D. F. AND FEYEREISEN, R. (1991). Identity of a second type of allatostatin from cockroach brains: an octadecapeptide amine with a tyrosine rich address sequence. *Proc. natn. Acad. Sci. U.S.A.* **88**, 2412–2417.
- PRATT, G. E., FARNSWORTH, D. E., SIEGEL, N. R., FOK, K. F. AND FEYEREISEN, R. (1989). Identification of an allatostatin from adult *Diptera punctata*. *Biochem. biophys. Res. Commun.* **163**, 1243–1247.
- SKIEBE, P. AND SCHNEIDER, H. (1994). Allatostatin peptides in the crab stomatogastric nervous system: inhibition of the pyloric motor pattern and distribution of allatostatin-like immunoreactivity. *J. exp. Biol.* **194**, 195–208.
- STANGIER, J., HILBICH, C., DIRCKSEN, H. AND KELLER, R. (1988). Distribution of a novel cardioactive peptide (CCAP) from pericardial organs of the shore crab, *Carcinus maenas*. *Peptides* **9**, 795–800.
- STAY, B., CHAN, K. K. AND WOODHEAD, A. P. (1992). Allatostatin-immunoreactive neurons projecting to the corpora allata of adult *Diptera punctata*. *Cell Tissue Res.* **270**, 15–23.
- TOBE, S. S. AND STAY, B. (1985). Structure and regulation of the corpus allatum. *Adv. Insect Physiol.* **18**, 305–432.
- VEELAERT, D., SCHOofs, L., TOBE, S. S., YU, C. G., VULLINGS, H. G., COULLAUD, F. AND DELOOF, A. (1995). Immunological evidence for an allatostatin-like neuropeptide in the central nervous system of *Schistocerca gregaria*, *Locusta migratoria* and *Neobelliera bullata*. *Cell Tissue Res.* **279**, 601–611.
- WEIMANN, J. M., MEYRAND, P. AND MARDER, E. (1991). Neurons that form multiple pattern generators: identification and multiple activity patterns of gastric/pyloric neurons in the crab stomatogastric system. *J. Neurophysiol.* **65**, 111–122.
- WEIMANN, J. M., SKIEBE, P., HEINZEL, H.-G., SOTO, C., KOPELL, N., JORGE-RIVERA, J. C. AND MARDER, E. (1997). Modulation of oscillator interactions in the crab stomatogastric ganglion by crustacean cardioactive peptide. *J. Neurosci.* **17**, 1748–1760.
- WEISS, K. R., COHEN, J. L. AND KUPFERMANN, I. (1978). Modulatory control of buccal musculature by a serotonergic neuron (metacerebral cell) in *Aplysia*. *J. Neurophysiol.* **41**, 181–203.
- WHIM, M. D. AND LLOYD, P. E. (1990). Neuropeptide cotransmitters released from identified cholinergic motor neurons in *Aplysia*. *J. Neurosci.* **10**, 3313–3322.
- WOODHEAD, A. P., STAY, B., SEIDEL, S. L., KHAN, M. A. AND TOBE, S. S. (1989). Primary structure of four allatostatins: neuropeptide inhibitors of juvenile hormone synthesis. *Proc. natn. Acad. Sci. U.S.A.* **86**, 5997–6001.
- YOON, J. G. AND STAY, B. (1995). Immunocytochemical localization of *Diptera punctata* allatostatin-like peptide in *Drosophila melanogaster*. *J. comp. Neurol.* **363**, 475–488.
